# Supplementary material for: BODIPY-containing nanoscale metal–organic frameworks as contrast agents for computed tomography
Source: Royal Society of Chemistry journal article supplement (doi:10.1039/c7tb00392g), 2017-01-01
Supplement: c7tb00392g1.pdf [file c7tb00392g1.pdf]

# BODIPY-containing Nanoscale Metal-Organic Frameworks as Contrast Agents for Computed Tomography

*Tao Zhang,<sup>a, b</sup> Lei Wang,<sup>\*, c</sup> Chong Ma,<sup>b</sup> Weiqi Wang,<sup>c, d</sup> Jun Ding,<sup>e</sup> Shi Liu,<sup>c</sup>*

*Xuwen Zhang,<sup>\*, a</sup> Zhigang Xie<sup>c</sup>*

<sup>a</sup>Department of General Surgery, The Second Hospital of Jilin University, 218 Ziqiang Street, Changchun, Jilin 130000, P. R. China

<sup>b</sup>Department of Gastrointestinal Colorectal and Anal Surgery, China-Japan Union Hospital of Jilin University, 126 Xiantai Street, Changchun, Jilin 130033, P. R. China

<sup>c</sup>State Key Laboratory of Polymer Physics and Chemistry, Changchun Institute of Applied Chemistry, Chinese Academy of Sciences, 5625 Renmin Street, Changchun, Jilin 130022, P. R. China

<sup>d</sup>University of Chinese Academy of Sciences, Beijing 100049, P. R. China

<sup>e</sup>Department of Radiology, China-Japan Union Hospital of Jilin University, 126 Xiantai Street, Changchun, Jilin 130033, P. R. China

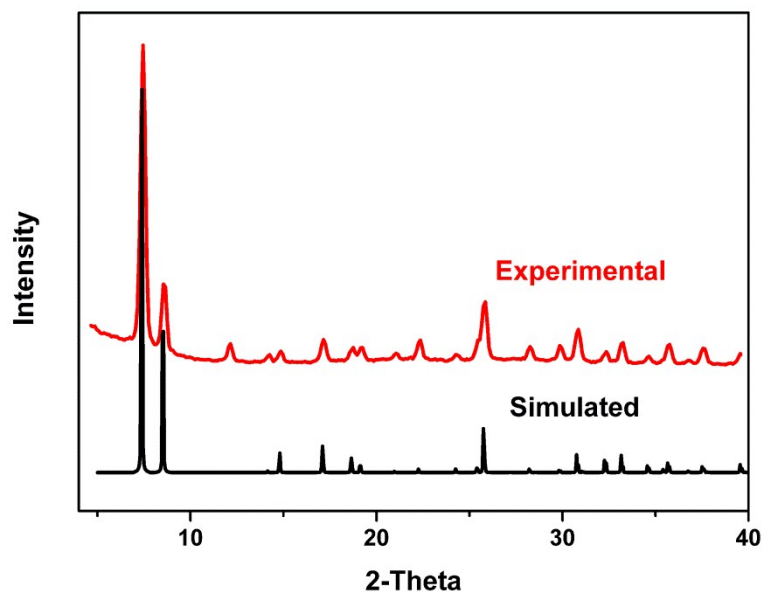

**Figure S1.** The powder X-ray diffraction of simulated UiO-66 (black) and UiO-PDT (red) from 4 to 40°.

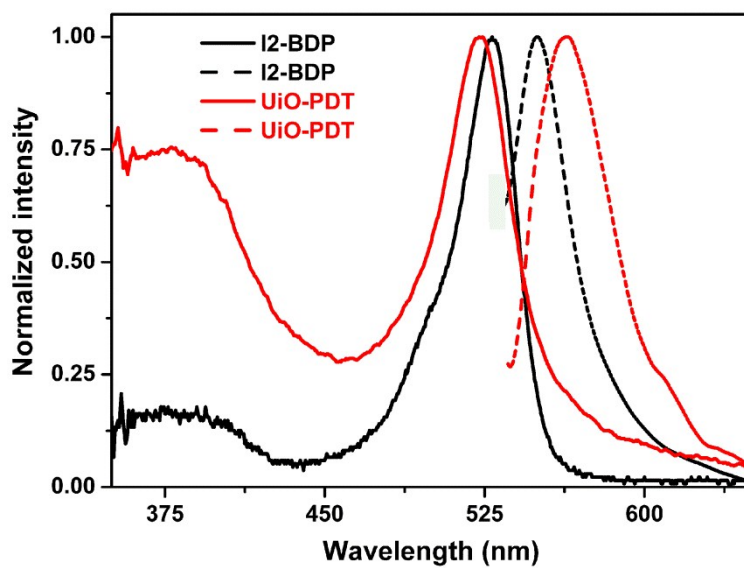

**Figure S2.** The UV (solid lines) and luminescence spectra (dashed lines) of **UiO-PDT** (red) and **I2-BDP** (black) dispersed into DMF, respectively.

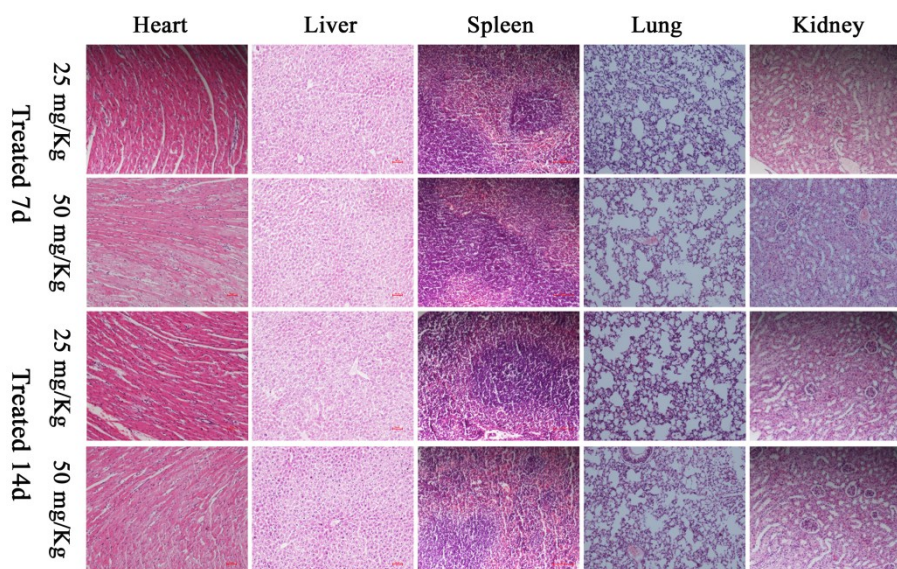

**Figure S3.** Histological evaluation of UiO-PDT toxicity *in vivo*. Heart, liver, spleen, lung and kidney were examined 7 days and 14 days after intraperitoneal injection of UiO-PDT at the dosage of 25 and 50 mg kg<sup>-1</sup>, respectively.

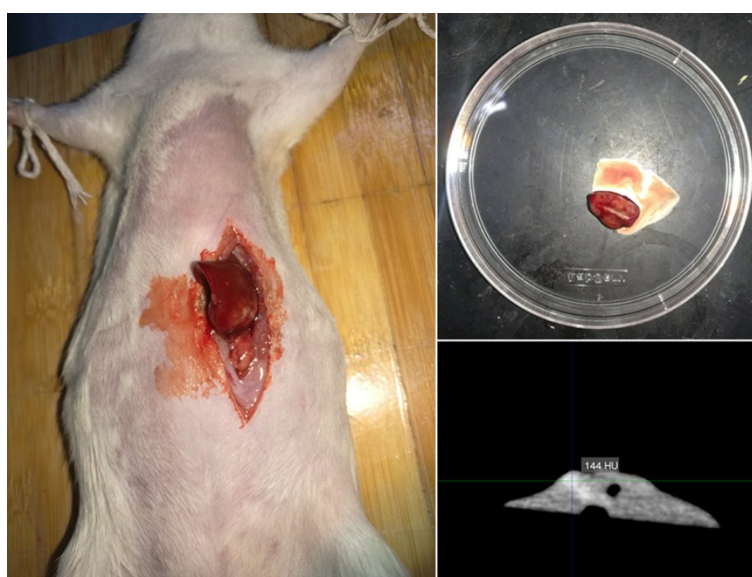

**Figure S4.** Photography and CT value of liver from a rat after 48 h injection of UiO-PDT nanocrystals at the dosage of 0.1 mg g<sup>-1</sup> body weight.
